# Supplementary material
Source: PubMed Central journal article supplement (PMC3533431)

## Supplemental Data

**Article Title:** Evidence for Substrate Dependent Inhibition Profiles for Human Liver Aldehyde Oxidase

**Authors:** John T. Barr and Jeffrey P. Jones

**Journal Title:** Drug Metabolism and Disposition

**Supplemental Figure 1.** Sample HPLC-MS/MS chromatogram traces for the detection of DACA acridone (top) and the IS (bottom).

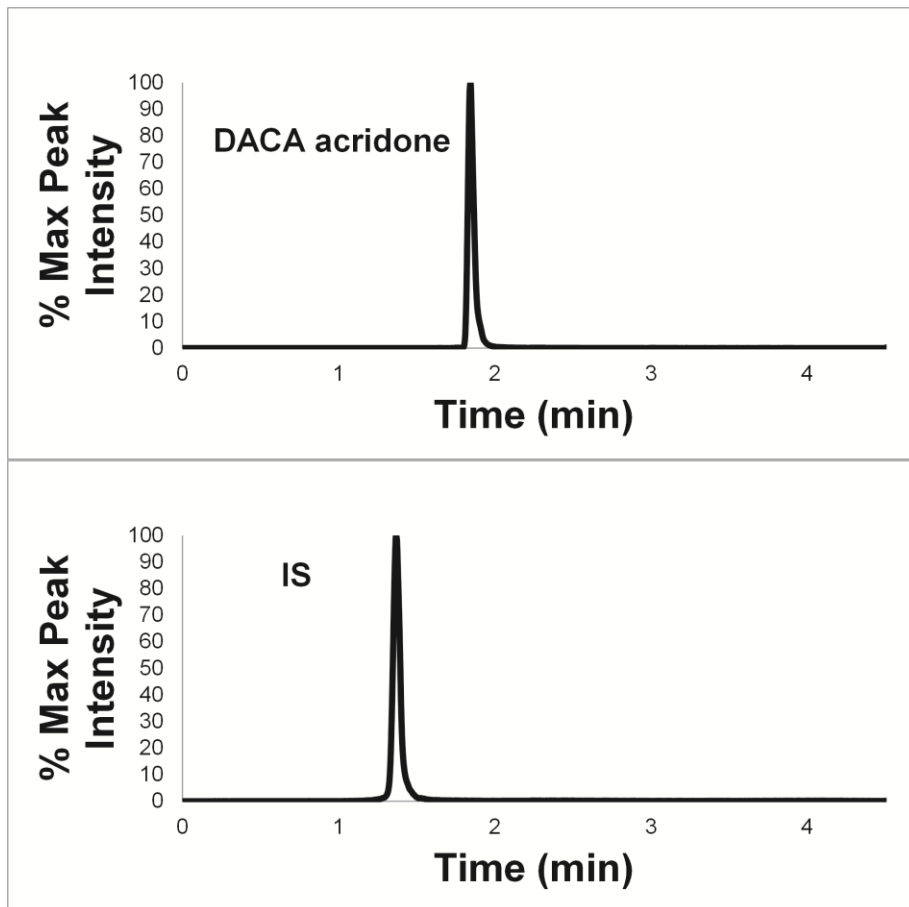

**Supplemental Figure 2.** Percent of control of DACA oxidase activity in human liver cytosol upon coincubation with a selective XO inhibitor (allopurinol, 100  $\mu\text{M}$ ) and a selective AO inhibitor (hydralazine, 100  $\mu\text{M}$ ). The activities were analyzed for two DACA concentrations. Bar graphs reflect the average of duplicate measurements  $\pm$  standard error.

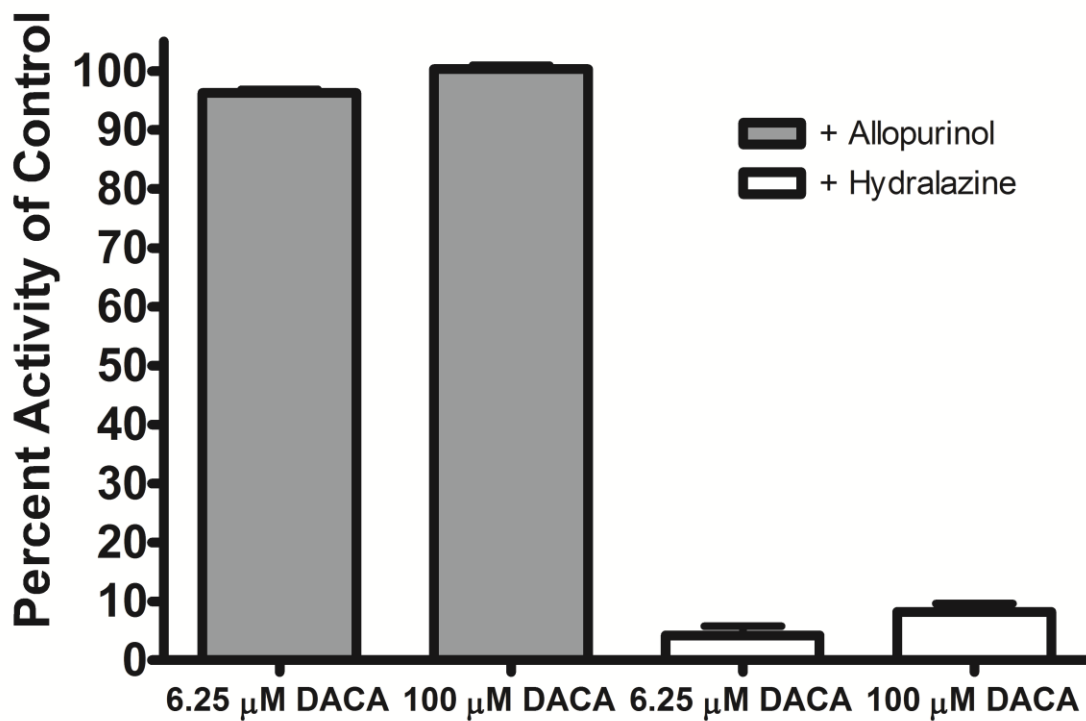

Supplement: supp_112.048546_Supp_Data_for_48546_Final.pdf [file supp_112.048546_Supp_Data_for_48546_Final.pdf]
